# Supplementary material for: A disposable and sensitive non-enzymatic glucose sensor based on a 3D-Mn-doped NiO nanoflower-modified flexible electrode
Source: Royal Society of Chemistry journal article supplement (doi:10.1039/d2an01495e), 2022-12-08
Supplement: d2an01495e1.pdf [file d2an01495e1.pdf]

## Supporting Information

### **A disposable and sensitive non-enzymatic glucose sensor based on 3D-Mn doped NiO nano-flower modified flexible electrode**

Huisi Yang<sup>1, a</sup>, Yian Hu<sup>1, a</sup>, Xinxue Yin<sup>1, a</sup>, Jiaqing Huang<sup>a</sup>, Cailin Qiao<sup>a</sup>, Zhikun  
Hu<sup>a</sup>, Congjuan He<sup>a</sup>, Danqun Huo<sup>a, c\*</sup>, Changjun Hou<sup>a, b\*</sup>

<sup>a</sup> Key Laboratory for Biorheological Science and Technology of Ministry of Education,  
State and Local Joint Engineering Laboratory for Vascular Implants, Bioengineering  
College of Chongqing University, Chongqing 400044, PR China

<sup>b</sup> Liquor Making Biology Technology and Application of Key Laboratory of Sichuan  
Province, College of Bioengineering, Sichuan University of Science and Engineering,  
Zigong, 643000, PR China

<sup>c</sup> Chongqing Key Laboratory of Bio-perception & Intelligent Information Processing,  
School of Microelectronics and Communication Engineering, Chongqing University,  
Chongqing, 400044, PR China

<sup>1</sup> Huisi Yang, Yian Hu and Xinxue Yin contribute equally to this work.

\* Corresponding author. Tel.: +86 23 6511 2673; fax: +86 23 6510 2507.

E-mail addresses: [huodq23@163.com](mailto:huodq23@163.com) (D. Huo)

[houcj@cqu.edu.cn](mailto:houcj@cqu.edu.cn) (C. Hou)

## 20 **Experimental section**

### 21 **Materials**

22 Carbon cloth (CFC) was obtained from TORAY Japan. Nickel chloride hexahydrate  
23 ( $\text{NiCl}_2 \cdot 6\text{H}_2\text{O}$ ) was purchased from the Kelon Chemical Reagent Factory (Chengdu,  
24 China). Manganese chloride tetrahydrate ( $\text{MnCl}_2 \cdot 4\text{H}_2\text{O}$ ) and hexamethylene tetramine ( $\text{C}_6\text{H}_{12}\text{N}_4$ )  
25 were bought from the Cologne Chemicals Co. Ltd (Chengdu, China). Absolute ethanol  
26 ( $\text{C}_2\text{H}_5\text{OH}$ ), acetone ( $\text{CH}_3\text{COCH}_3$ ) and urea were purchased from the Chuandong Chemical  
27 Industry Group (Chongqing, China). Sodium hydroxide ( $\text{NaOH}$ ) was bought from the  
28 Sinopharm Chemical Reagent Co. Ltd. Glucose (Glu) was purchased from ACROS.  
29 Ascorbic acid (AA), acetylsalicylic acid (ASA), acetaminophen (AMP),  $\text{NaCl}$  and glycine  
30 (Gly) were obtained from Sigma-Aldrich (St. Louis, USA). Dopamine hydrochloride (DA)  
31 was purchased from the Yuancheng Chemical Co. Ltd (Wuhan, China). Ultrapure water  
32 was produced from a Milli-Q system ( $18.25 \text{ M}\Omega \text{ cm}^{-1}$ ).

### 33 **Characterization**

34 The structure of the as-prepared Bare CFC,  $\text{NiO/CFC}$  and  $\text{Mn-NiO/CFC}$  was  
35 characterized by a Nova 400 scanning electron microscope (SEM). The element content  
36 and composition of the electrode materials were analyzed quantitatively and qualitatively  
37 by EDS. The x-ray diffraction (XRD) analysis was performed using Bruker AXS D5005  
38 to obtain the crystal structure and phase information of the samples. The chemical  
39 composition and electronic structure of samples were conducted on an ESCALAB250Xi  
40 X-ray photoelectron spectroscopy (XPS).

### 41 **Electrochemical measurements**

42 A CHI 760E (Shanghai, CH Instruments, Inc.) electrochemical workstation was used  
43 to conduct all electrochemical measurements. A conventional three-electrode system was  
44 employed for the experiments, with the as-prepared  $\text{Mn-NiO/CFC}$  as the working  
45 electrode, a platinum wire as the counter electrode and  $\text{Ag/AgCl}$  (3 M  $\text{KCl}$ ) as the reference  
46 electrode. The techniques of cyclic voltammetry (CV), electrochemical impedance  
47 spectroscopy (EIS) and Amperometric  $i$ -t curves were applied to investigate the  
48 electrochemical performance of the prepared  $\text{Mn-NiO/CFC}$  electrode in 100 mM  $\text{NaOH}$

49 solution or 10 mL 5 mM·L<sup>-1</sup> [Fe(CN)<sub>6</sub>]<sup>3-/4-</sup> solution (including 0.1 M KCl). In addition, all  
50 tests were performed at room temperature.

### 51 **Electrochemical characterization**

52 The conductivity of the bare CFC, NiO/CFC and Mn-NiO/CFC electrodes was tested  
53 by CV and EIS in 10 mL 5 mM·L<sup>-1</sup>[Fe(CN)<sub>6</sub>]<sup>3-/4-</sup> solution (including 0.1 M KCl). The CVs  
54 were carried out at a scan rate 50 mV/s from -0.2 V to 0.6 V. The frequency range  
55 investigated by EIS was 10<sup>-1</sup> to 10<sup>5</sup> Hz. The glucose catalytic performance of the three  
56 electrodes was tested by amperometry in 10 mL NaOH with adding 150 μM glucose every  
57 50 s for seven times. The CVs of Mn-NiO/CFC at different scan rate (25-500 mV/s) were  
58 recorded to investigate the reaction kinetics. Furthermore, the scanning potential of CVs  
59 varied from 0 to 0.8V, and the scan rate was 50 mV/s.

### 60 **Optimization**

61 CVs were conducted by dropping 1 mM glucose into different concentrations of  
62 NaOH solutions (25, 50, 75, 100, 125, 150 mM) to obtain the optimal concentration of  
63 NaOH. The electrocatalytic performance of Mn-NiO/CFC to different concentrations of  
64 glucose (0, 1, 2, 4, 6 mM) was tested with CV at optimal concentrations, with a scan rate  
65 50 mV/s from 0.2 V to 1.0 V. The optimal working potential and preparation calcination  
66 time of the electrode materials were obtained through comparing a series of potentials by  
67 adding 150 μM glucose continuously for seven times.

### 68 **Linear detection research**

69 At the optimal working potential of 0.6 V, the linear study of the electrode was carried  
70 out by amperometry in 10 mL 100 mM NaOH solution system with continuously adding  
71 different concentrations of glucose every 50 s, three times for each concentration.

### 72 **Selectivity and reproducibility study of the Mn-NiO/CFC**

73 Under the optimal experimental conditions, selectivity of the Mn-NiO/CFC was  
74 evaluated with continuously adding 500 μM glucose and 50 μM biological interfering  
75 species such as AA, UA, Fru, Suc, urea and DA by using amperometric method. The  
76 reproducibility of this sensor was confirmed at 0.6 V via assessing the current response of  
77 150 μM glucose at five Mn-NiO/CFC electrodes prepared by the same way. Each electrode  
78 was repeated three times.

79 **Figure S1:**

80

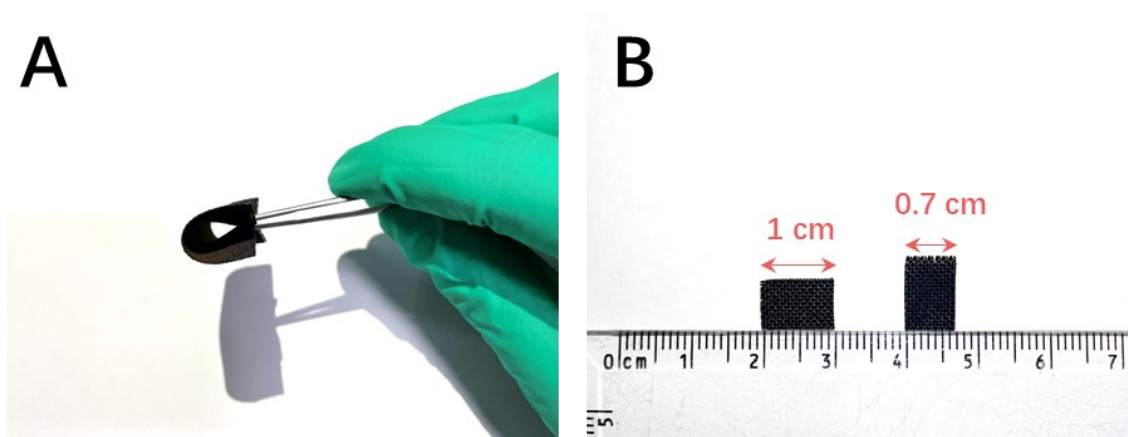

81

82 **Figure S1** (A) Images of the prepared flexible CFC ( $5 \times 5 \text{ cm}^2$ ); the CFCs with a size of  $1 \times 0.7 \text{ cm}^2$

83

84 **Figure S2:**

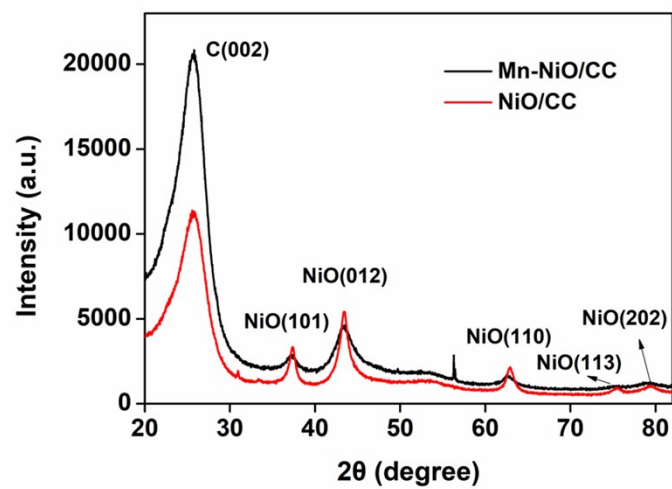

85

86 **Figure S2** XRD patterns for the Mn-NiO/CFC and NiO/CFC

87 **Figure S3:**

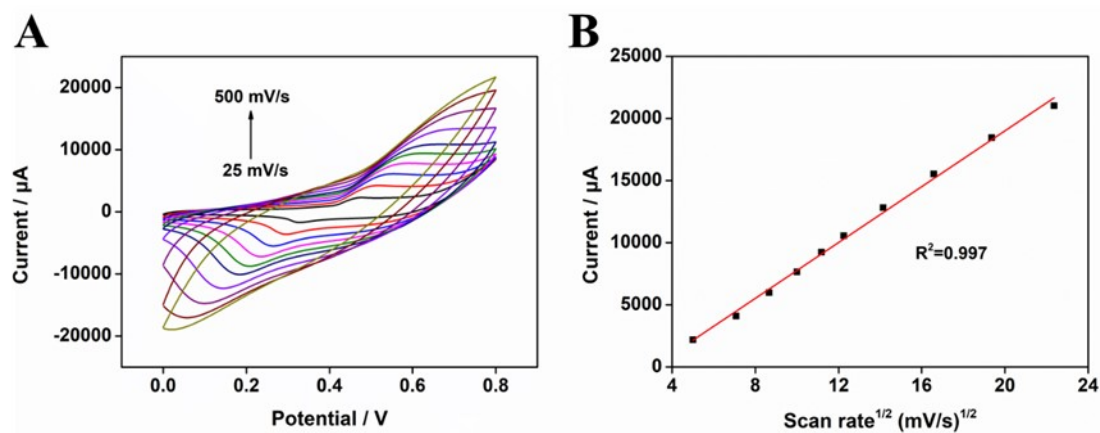

88

89 **Figure S3** (A) CVs of the Mn-NiO/CFC at different scan rates (solution: 100 mM NaOH containing 1  
 90 mM glucose); (B) The linear fitting diagram of its oxidation peak current and the square root of the  
 91 sweep speed.

92 **Table S1** Comparison of the performance of Mn-NiO /CFC sensor electrode and other sensors of the  
93 similar type for glucose detection.

| Electrode materials                                                     | Linear range ( $\mu\text{M}$ ) | LOD ( $\mu\text{M}$ ) | Documents |
|-------------------------------------------------------------------------|--------------------------------|-----------------------|-----------|
| Ni <sub>7</sub> S <sub>6</sub> /NiO                                     | 90-3120                        | 0.3                   | 1         |
| Ni/Cu(OH) <sub>2</sub> NS                                               | 10-1490                        | 1.27                  | 2         |
| Ni/Co-TCPP MOFs                                                         | 1-3800                         | 0.3                   | 3         |
| Ni/PANI coaxial nanowires                                               | 0-7000                         | 10                    | 4         |
| CuO polyhedrons/CFC                                                     | 0.5-800                        | 0.46                  | 5         |
| Co <sub>3</sub> O <sub>4</sub> /CuO NRA/CFC                             | 1-500                          | 0.38                  | 6         |
| MOF-74(Cu) NS-CFC                                                       | 1-1000                         | 0.41                  | 7         |
| CuO/Ni(OH) <sub>2</sub> /CFC                                            | 50-8500                        | 0.31                  | 8         |
| CuCo <sub>2</sub> O <sub>4</sub> @NiCo <sub>2</sub> O <sub>4</sub> /CFC | 1-1158                         | 0.35                  | 9         |
| GCE/WMCNT/ZnO NPs                                                       | 100~10000                      | 0.82                  | 10        |
| GCE/CuO NWs-MoS <sub>2</sub> /Au NPs                                    | 0.5~5670                       | 0.5                   | 11        |
| GCE/Hollow cage-like NiO                                                | 0.1~5000                       | 0.1                   | 12        |
| Cu <sub>3</sub> Se <sub>2</sub> film                                    | 2.8~1500                       | 2.8                   | 13        |
| GCE/Cu/ZnO NC                                                           | 10~7000                        | 57                    | 14        |
| GCE/MXene-Cu <sub>2</sub> O                                             | 10~30000                       | 2.83                  | 15        |
| Mn-NiO/CFC                                                              | 3-5166                         | 0.28                  | This work |

95 **Figure S4:**

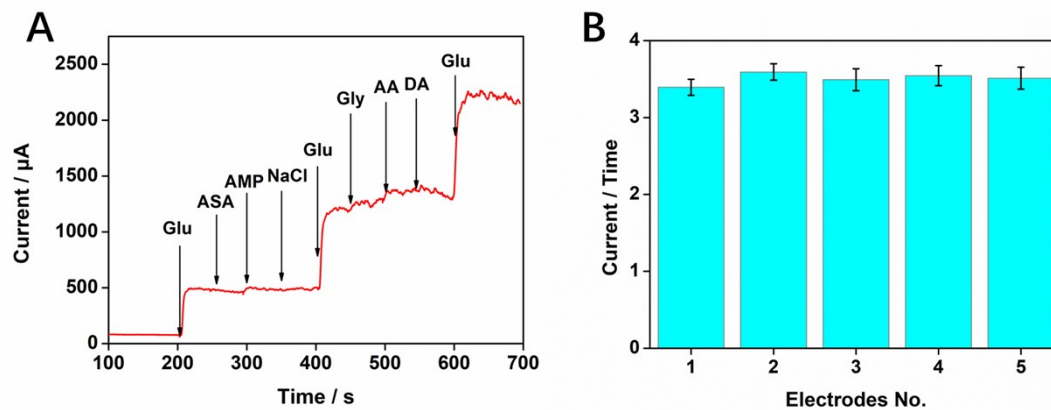

96

97 **Figure S4 (A)** Amperometric response of the the Mn-NiO/CFC to the selectivity of glucose; **(B)**

98 Reproducibility of five Mn-NiO/CFC electrodes. (The error bar was calculated based on the standard

99 deviation of 3 measurements, n=3)

100

101 **Figure S5:**

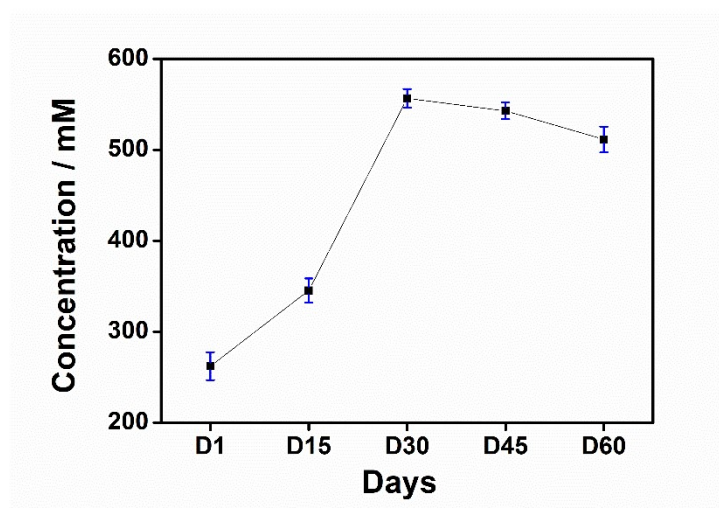

102

103 **Figure S5** Determination of glucose in sorghum fermentation broth of different cycle by  
104 Mn-NiO/CFC sensors. (The error bar was calculated based on the standard deviation of 3  
105 measurements, n=3)

## 106 REFERENCES

- 107 1. Z. Tan, Y. Huang, S. Wang, C. Feng, Z. Sun, H. Wu and Y. Zhang, *Ionics*, 2019,  
108 **25**, 3961-3969.
- 109 2. T. Zhe, X. Sun, Y. Liu, Q. Wang, F. Li, T. Bu, P. Jia, Q. Lu, J. Wang and L.  
110 Wang, *Microchemical Journal*, 2019, **151**.
- 111 3. S. Li, X. Zhan, W. Bai and J. Zheng, *Journal of The Electrochemical Society*,  
112 2020, **167**.
- 113 4. H. Wang, J. Qiu, S. Sun, W. Zhang and S. Yao, *Journal of Materials Science:*  
114 *Materials in Electronics*, 2021, **32**, 7751-7764.
- 115 5. S. Cheng, X. Gao, S. Delacruz, C. Chen, Z. Tang, T. Shi, C. Carraro and R.  
116 Maboudian, *J Mater Chem B*, 2019, **7**, 4990-4996.
- 117 6. S. Cheng, S. Delacruz, C. Chen, Z. Tang, T. Shi, C. Carraro and R. Maboudian,  
118 *Sensors and Actuators B: Chemical*, 2019, **298**.
- 119 7. S. Hu, Y. Lin, J. Teng, W. L. Wong and B. Qiu, *Mikrochim Acta*, 2020, **187**, 670.
- 120 8. S. Sun, N. Shi, X. Liao, B. Zhang, G. Yin, Z. Huang, X. Chen and X. Pu, *Applied*  
121 *Surface Science*, 2020, **529**.
- 122 9. S. Liu, W. Zeng, Q. Guo and Y. Li, *Nanotechnology*, 2020, **31**, 495708.
- 123 10. A. Tarlani, M. Fallah, B. Lotfi, A. Khazraei, S. Golsanamlou, J. Muzart and M.  
124 Mirza-Aghayan, *Biosens Bioelectron*, 2015, **67**, 601-607.
- 125 11. J. Bao, Y. L. Qi, D. Q. Huo, J. Z. Hou, X. T. Geng, M. Samalo, Z. S. Liu, H. B.  
126 Luo, M. Yang and C. J. Hou, *J Electrochem Soc*, 2019, **166**, B1179-B1185.
- 127 12. Z. H. Ibupoto, A. Nafady, R. A. Soomro, Sirajuddin, S. T. H. Sherazi, M. I. Abro  
128 and M. Willander, *Rsc Adv*, 2015, **5**, 18773-18781.
- 129 13. D. B. Malavekar, S. B. Jadhav, S. B. Kale, U. M. Patil and C. D. Lokhande,  
130 *Mater Today Sustain*, 2022, **20**.
- 131 14. A. El Golli, M. Echabaane and C. Dridi, *Mater Chem Phys*, 2022, **280**.
- 132 15. T. S. Gopal, S. K. Jeong, T. A. Alrebdi, S. Pandiaraj, A. Alodhayb, M.  
133 Muthuramamoorthy and A. N. Grace, *Mater Today Chem*, 2022, **24**.

134
